# Supplementary material
Source: publisher site journal article supplement (https://www.spandidos-publications.com/6522/downloadSupplementary)
Supplement: Supplementary file 1 [file downloadSupplementary]

## Sheet: Table S4 药物皮尔森相关性
Table SIV. Correlation of KTCD5 expression and drugs.
symbol	rho	pvalue
XAV939_1268	0.393054	9.32e-09
Mitoxantrone_1810	0.387766	1.53e-08
PFI3_1620	0.384284	2.1e-08
Leflunomide_1578	0.380185	3.05e-08
Olaparib_1017	0.376104	4.39e-08
Epirubicin_1511	0.363657	1.29e-07
AZ960_1250	0.363421	1.32e-07
AMG.319_2045	0.360773	1.65e-07
GSK343_1627	0.354824	2.72e-07
LY2109761_1852	0.354314	2.83e-07
JQ1_2172	0.354077	2.89e-07
Teniposide_1809	0.350491	3.87e-07
Nelarabine_1814	0.346894	5.18e-07
SB216763_1025	0.343371	6.87e-07
Picolinici.acid_1635	0.342909	7.12e-07
Obatoclax.Mesylate_1068	0.339223	9.52e-07
Niraparib_1177	0.339089	9.62e-07
PRIMA.1MET_1131	0.336534	1.17e-06
PAK_5339_1730	0.333594	1.47e-06
Talazoparib_1259	0.332056	1.66e-06
CZC24832_1615	0.328275	2.21e-06
Mirin_1048	0.328052	2.24e-06
Savolitinib_1936	0.323855	3.07e-06
Venetoclax_1909	0.320844	3.83e-06
Topotecan_1808	0.320833	3.84e-06
Temozolomide_1375	0.319403	4.26e-06
Alisertib_1051	0.318924	4.41e-06
Zoledronate_1802	0.317454	4.91e-06
JAK1_8709_1718	0.314982	5.86e-06
AZD5153_1706	0.311721	7.4e-06
MIM1_1996	0.308905	9.03e-06
Ruxolitinib_1507	0.308512	9.28e-06
Crizotinib_1083	0.302741	1.39e-05
Ribociclib_1632	0.301435	1.51e-05
RVX.208_1625	0.3012	1.54e-05
IAP_5620_1428	0.293795	2.53e-05
Foretinib_2040	0.292073	2.84e-05
AZD1208_1449	0.291986	2.86e-05
Irinotecan_1088	0.290589	3.13e-05
LJI308_2107	0.290066	3.24e-05
EPZ5676_1563	0.284557	4.63e-05
IWP.2_1576	0.284083	4.78e-05
IRAK4_4710_1716	0.281317	5.7e-05
WIKI4_1940	0.280296	6.08e-05
GSK2606414_1618	0.280098	6.15e-05
BMS.754807_2171	0.280023	6.18e-05
Dactinomycin_1911	0.278403	6.84e-05
AZD5438_1401	0.277888	7.07e-05
CDK9_5038_1709	0.275338	8.29e-05
PCI.34051_1621	0.274588	8.68e-05
CDK9_5576_1708	0.27313	9.49e-05
Cisplatin_1005	0.272242	0.00010025
Dabrafenib_1373	0.271956	0.000102018
Cytarabine_1006	0.267746	0.000131697
Camptothecin_1003	0.265746	0.000148455
Vincristine_1818	0.262361	0.00018145
PRT062607_1631	0.261822	0.000187298
MN.64_1854	0.260948	0.000197149
EPZ004777_1237	0.2608	0.000198862
Gemcitabine_1190	0.25782	0.000236519
KU.55933_1030	0.256713	0.000252122
GDC0810_1925	0.256605	0.000253689
BI.2536_1086	-0.255522	0.000269968
Oxaliplatin_1089	0.253869	0.000296713
I.BET.762_1624	0.253744	0.000298829
PD173074_1049	0.25245	0.000321596
MIRA.1_1931	0.252332	0.000323752
BMS.345541_1249	0.251854	0.000332619
Dactinomycin_1811	0.251142	0.000346239
Sabutoclax_1849	0.248017	0.000412396
AZ6102_2109	0.24634	0.000452569
Oxaliplatin_1806	0.244779	0.000493179
Elephantin_1835	0.244441	0.000502409
Navitoclax_1011	0.242011	0.000573553
GSK591_2110	0.241983	0.000574455
Vinorelbine_2048	0.240337	0.000627892
Staurosporine_1034	0.236044	0.000789684
BIBR.1532_2043	0.23351	0.000902373
AZD4547_1786	0.232975	0.000927949
VSP34_8731_1734	0.232243	0.000964091
Cyclophosphamide_1512	0.230829	0.00103753
P22077_1933	0.229994	0.00108332
AZD5582_1617	0.228369	0.00117772
Fludarabine_1813	0.227187	0.00125107
KRAS..G12C..Inhibitor.12_1855	0.227154	0.00125315
LCL161_1557	0.22633	0.00130681
LGK974_1598	0.226304	0.00130855
Entospletinib_1630	0.225967	0.00133108
IGF1R_3801_1738	0.223981	0.00147154
Pevonedistat_1529	0.223239	0.00152742
GSK2578215A_1927	0.22294	0.00155041
Dinaciclib_1180	0.221238	0.00168778
Docetaxel_1819	0.221004	0.00170753
GSK269962A_1192	0.218611	0.00192177
PF.4708671_1129	0.216939	0.00208566
MK.8776_2046	0.214862	0.00230691
X5.Fluorouracil_1073	0.213685	0.00244161
BDP.00009066_1866	0.213491	0.00246441
I.BRD9_1928	0.211848	0.00266604
PD0325901_1060	0.210506	0.00284172
Gallibiscoquinazole_1830	0.210202	0.00288289
AZD8186_1918	0.20659	0.00341594
WZ4003_1614	0.2033	0.00397714
UMI.77_1939	0.203109	0.00401219
Podophyllotoxin.bromide_1825	0.203103	0.00401318
Wnt.C59_1622	0.202977	0.00403645
Telomerase.Inhibitor.IX_1930	0.202849	0.00406019
ABT737_1910	0.202711	0.00408591
Pyridostatin_2044	0.202036	0.00421392
Entinostat_1593	0.201595	0.00429956
BPD.00008900_1998	0.201396	0.00433869
AGI.5198_1913	0.200702	0.00447757
OTX015_1626	0.200396	0.00454013
AGI.6780_1634	0.200114	0.00459841
Dasatinib_1079	0.198556	0.004933
ULK1_4989_1733	0.195728	0.00559634
Nilotinib_1013	0.195671	0.00561059
ZM447439_1050	0.193833	0.00608457
MK.1775_1179	0.193275	0.00623525
JAK_8517_1739	0.190424	0.00705928
Sepantronium.bromide_1941	0.190213	0.00712381
Dactolisib_1057	0.188302	0.00773396
Sorafenib_1085	0.186988	0.00818035
OF.1_1853	0.186228	0.00844856
Buparlisib_1873	0.186126	0.00848513
Erlotinib_1168	0.185265	0.00879967
VE821_2111	0.183211	0.0095925
YK.4.279_1239	0.180401	0.0107788
Luminespib_1559	0.177576	0.0121001
Wee1.Inhibitor_1046	0.177357	0.0122081
Vinblastine_1004	0.176739	0.0125182
Fulvestrant_1200	0.176355	0.012714
Doramapimod_1042	0.176052	0.0128704
AZD6738_1917	0.173569	0.0142182
Rapamycin_1084	0.173416	0.0143052
AZD8055_1059	0.172807	0.0146559
Bortezomib_1191	0.172753	0.0146869
ML323_1629	0.172458	0.0148602
Paclitaxel_1080	0.171427	0.0154783
Linsitinib_1510	0.170943	0.0157764
BMS.536924_1091	0.16837	0.0174451
AZD6482_2169	0.166873	0.0184856
Fulvestrant_1816	0.166354	0.0188588
Nutlin.3a...._1047	0.161819	0.0224052
NU7441_1038	0.161622	0.0225718
Carmustine_1807	0.159605	0.0243365
NVP.ADW742_1932	0.158784	0.0250879
Ibrutinib_1799	0.158293	0.025547
VE.822_1613	0.156485	0.0272999
WEHI.539_1997	0.156119	0.0276666
Docetaxel_1007	0.154857	0.0289659
MG.132_1862	0.154226	0.0296339
Palbociclib_1054	0.153938	0.0299432
SB505124_1194	-0.153292	0.0306471
Acetalax_1804	-0.152896	0.0310863
AZD5991_1720	0.152703	0.0313014
AZD1332_1463	0.152694	0.0313119
GNE.317_1926	0.148888	0.0358336
TAF1_5496_1732	0.146298	0.0392175
AZD7762_1022	0.145027	0.0409739
Axitinib_1021	0.144905	0.0411465
Ulixertinib_2047	0.144608	0.0415683
Alpelisib_1560	0.14386	0.0426447
